# Supplementary material
Source: publisher figshare collection journal article supplement (https://karger.figshare.com/ndownloader/files/15033881)

**Figure S1. Phenotypic characterization of human primary renal proximal tubular epithelial cells and human renal fibroblasts.**

**A.**

**Epithelial cells**

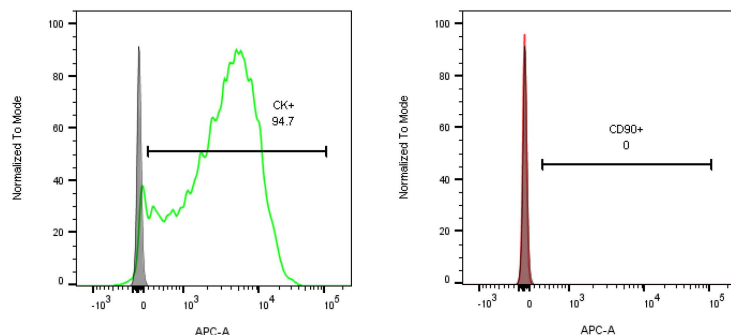

**CK18 and CD90/Thy1 expression**

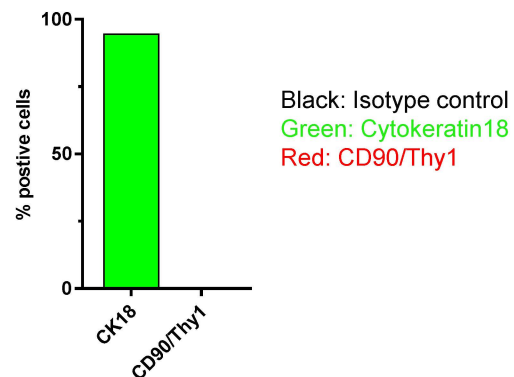

**B.**

**Fibroblasts**

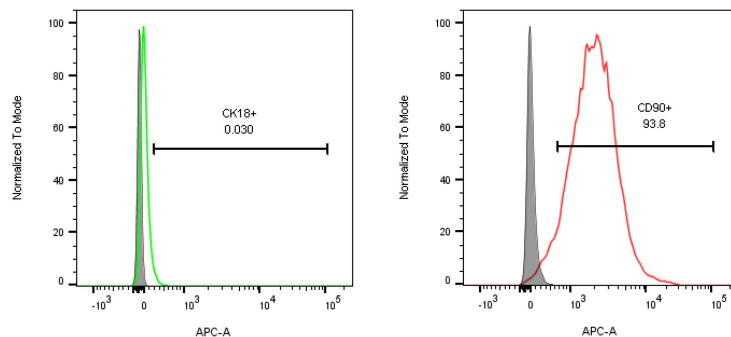

**CK18 and CD90/Thy1 expression**

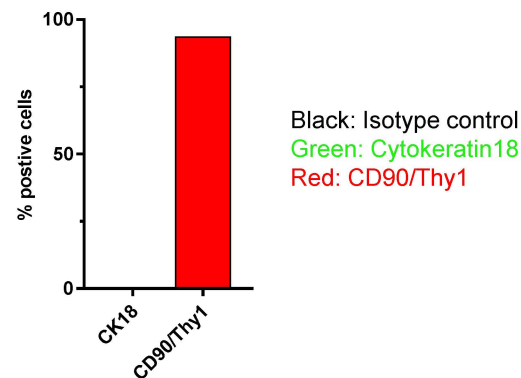

**Figure S2. A high-content imaging in vitro cell assay for the measurement of ECM accumulation in a co-culture of human renal epithelial cells and fibroblasts.**

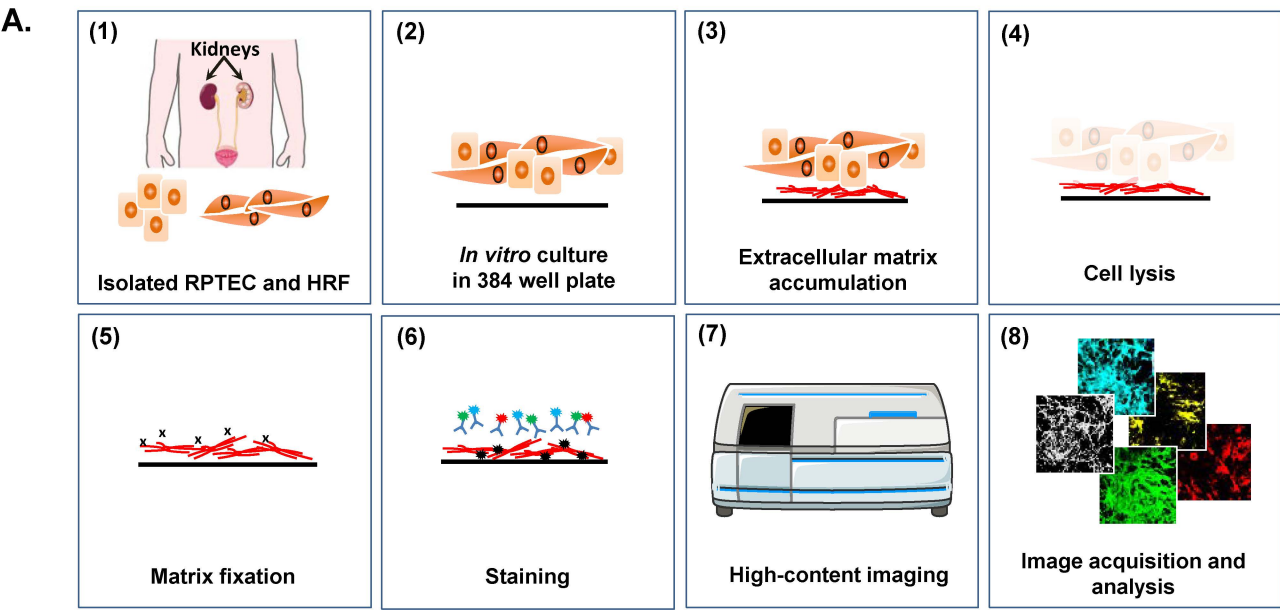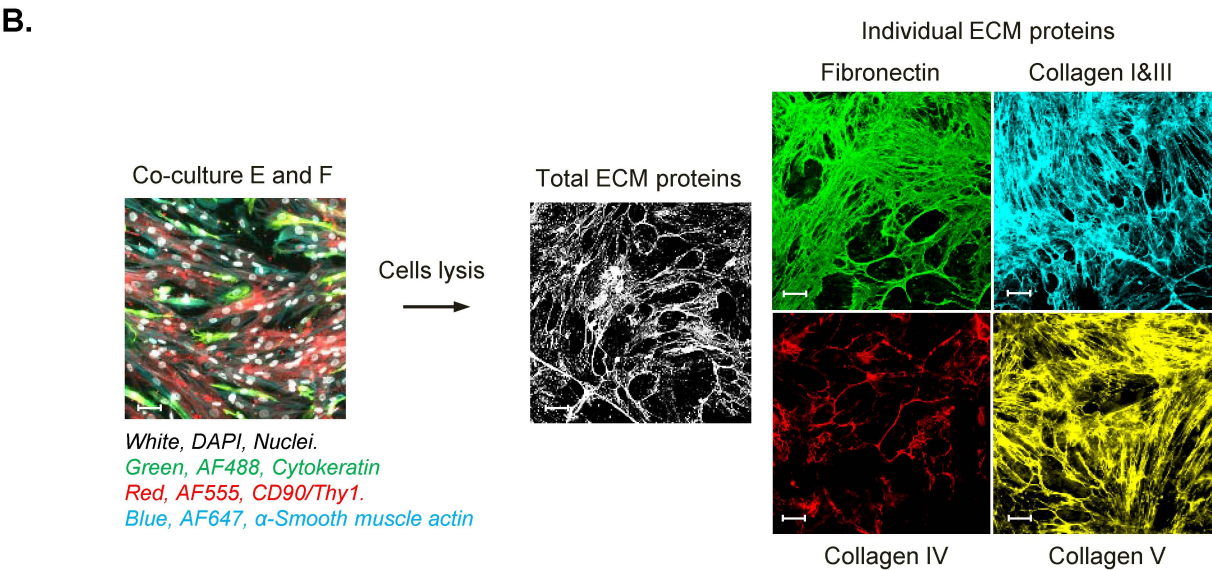

**Figure S3. Fluorescent labelling of epithelial cells and fibroblasts.**

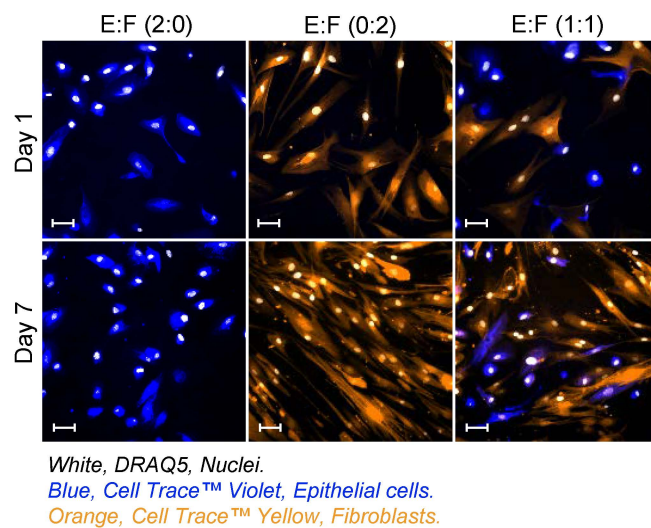

**Figure S4. Both epithelial cells and fibroblasts contribute to extracellular matrix production.**

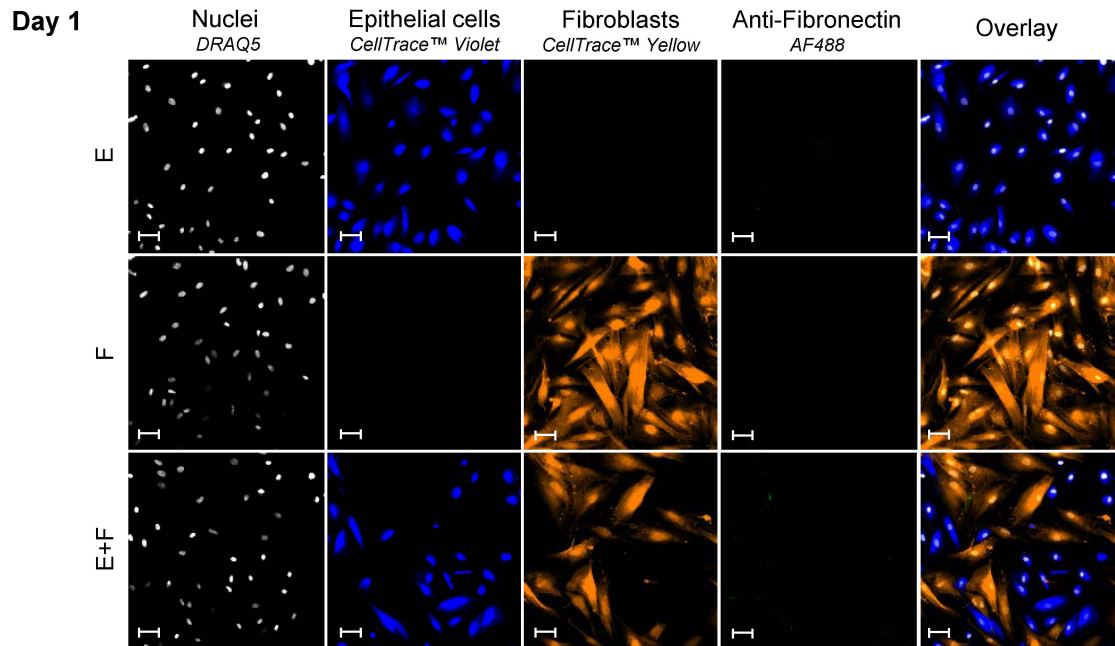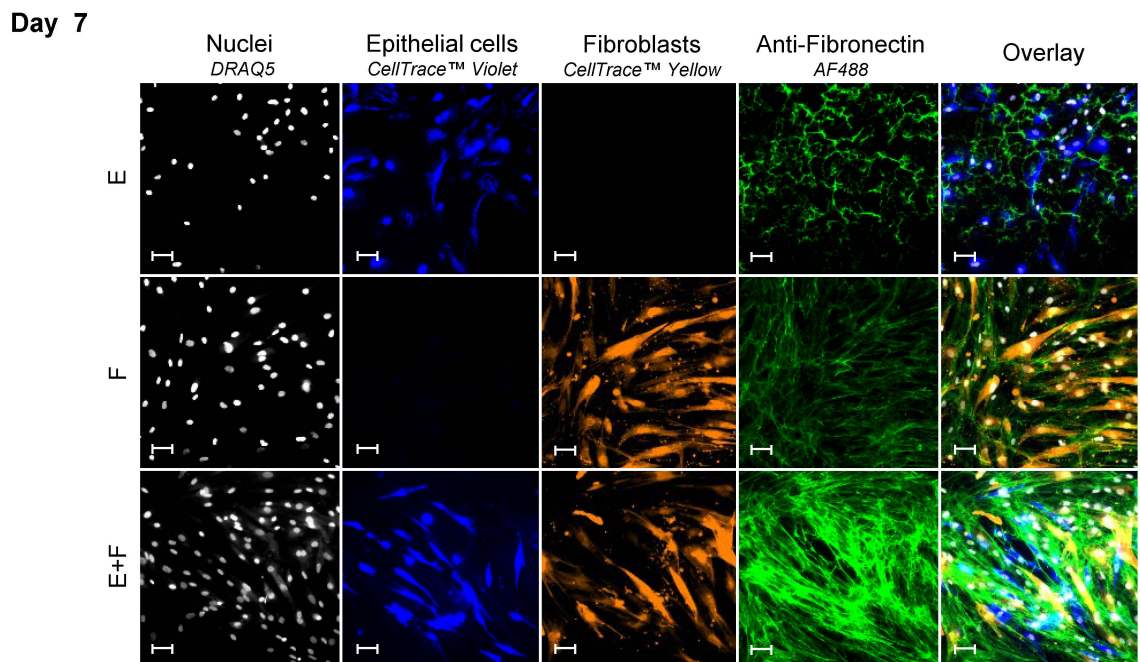

White, *DRAQ5*, Nuclei.

Blue, *Cell Trace™ Violet*, Epithelial cells.

Orange, *Cell Trace™ Yellow*, Fibroblasts.

Green, *AF488*, Fibronectin.

**Figure S5. Multiple integrins are expressed in all mono- and co-culture cell systems.**

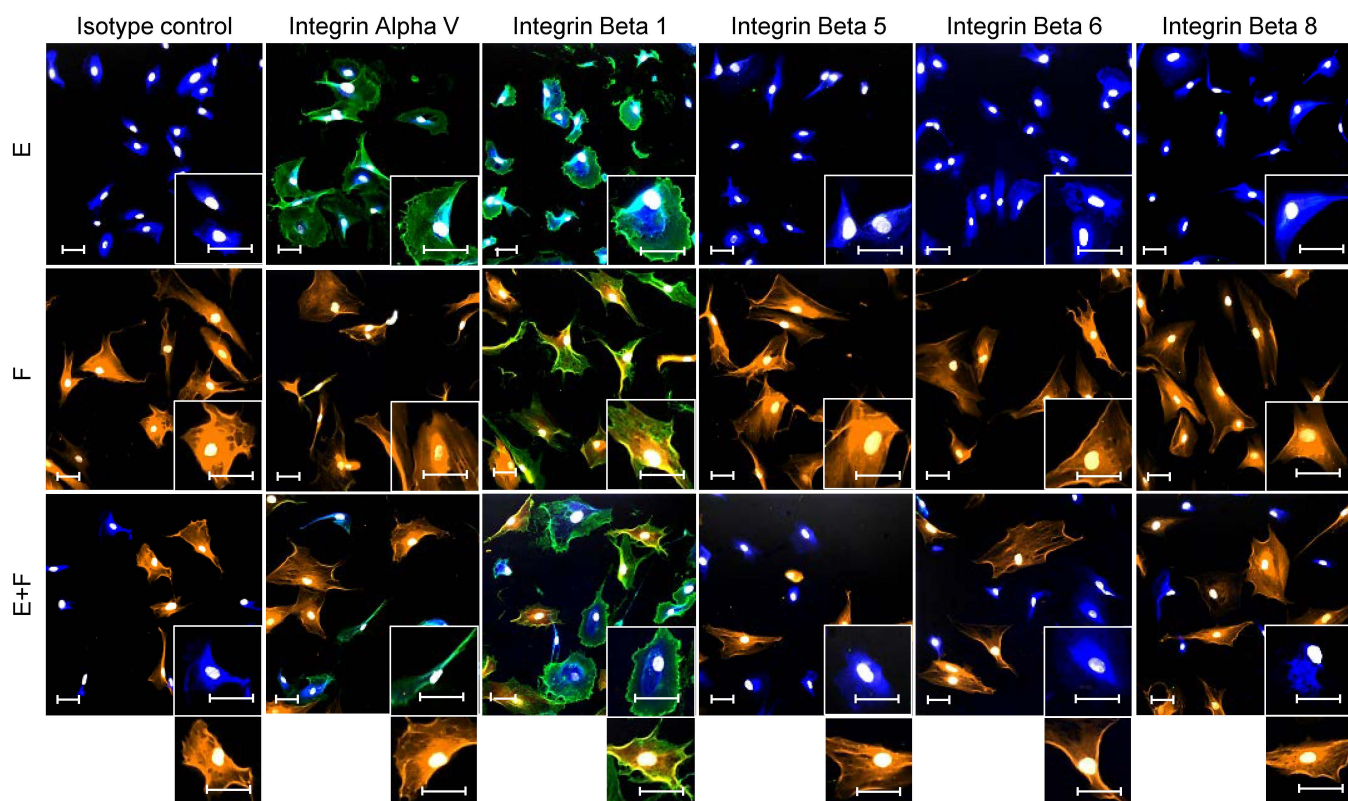

White, DRAQ5, Nuclei.

Blue, Cell Trace™ Violet, Epithelial cells.

Orange, Cell Trace™ Yellow, Fibroblasts.

Green, AF488, Anti-integrin antibody.



**Figure S6. The pan TGF- $\beta$  antibody and the integrin Alpha V antibody do not act synergistically.**

**A.**

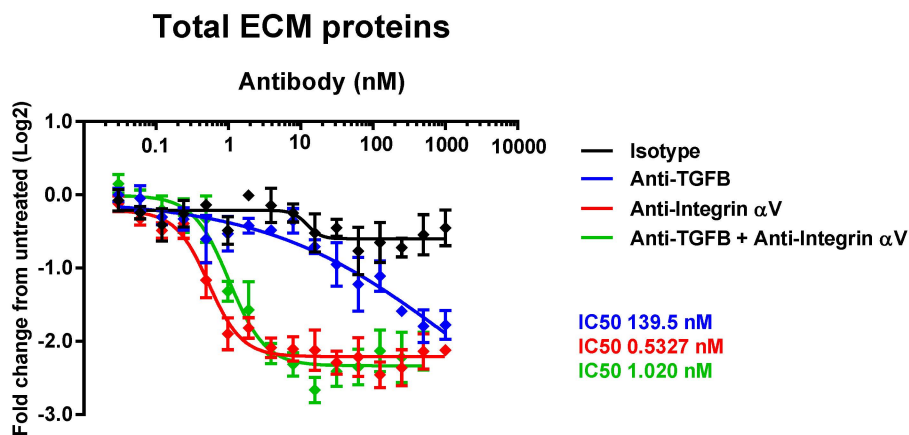

**B**

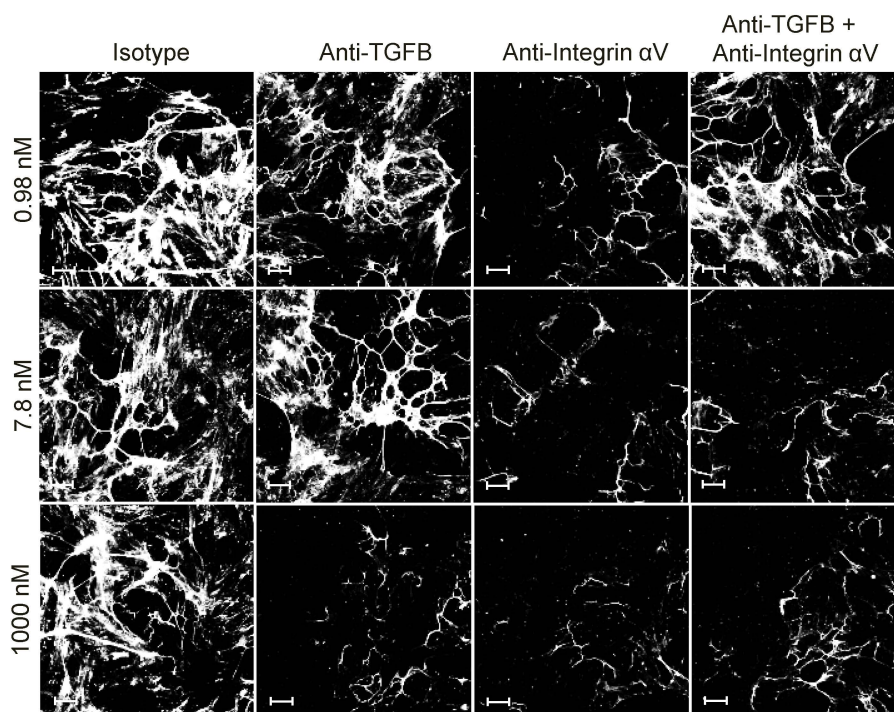

Supplement: Supplementary file 1 [file 15033881]
